# Supplementary material for: Coenzyme A binding sites induce proximal acylation across protein families
Source: PubMed Central journal article supplement (PMC10050154; doi:10.1038/s41598-023-31900-5), 2023-03-28

## Supplementary Information

### **Coenzyme A binding sites induce proximal acylation across protein families**

Chris Carrico<sup>1#</sup>, Andrew Cruz<sup>1#</sup>, Marius Walter<sup>1,2</sup>, Jesse Meyer<sup>1</sup>, Cameron Wehrfritz<sup>1</sup>, Samah Shah<sup>1</sup>, Lei Wei<sup>1</sup>, Birgit Schilling<sup>1</sup>, Eric Verdin<sup>1\*</sup>

This supplementary information file includes:

- Supplementary Figure 1
- Legend of Supplementary Table 1
- Raw western blot images for figures 5B and 5C

**Supplementary Table 1: CoA-Binding Proteins in the Human and Mouse Proteomes**

## Supplementary Figure 1

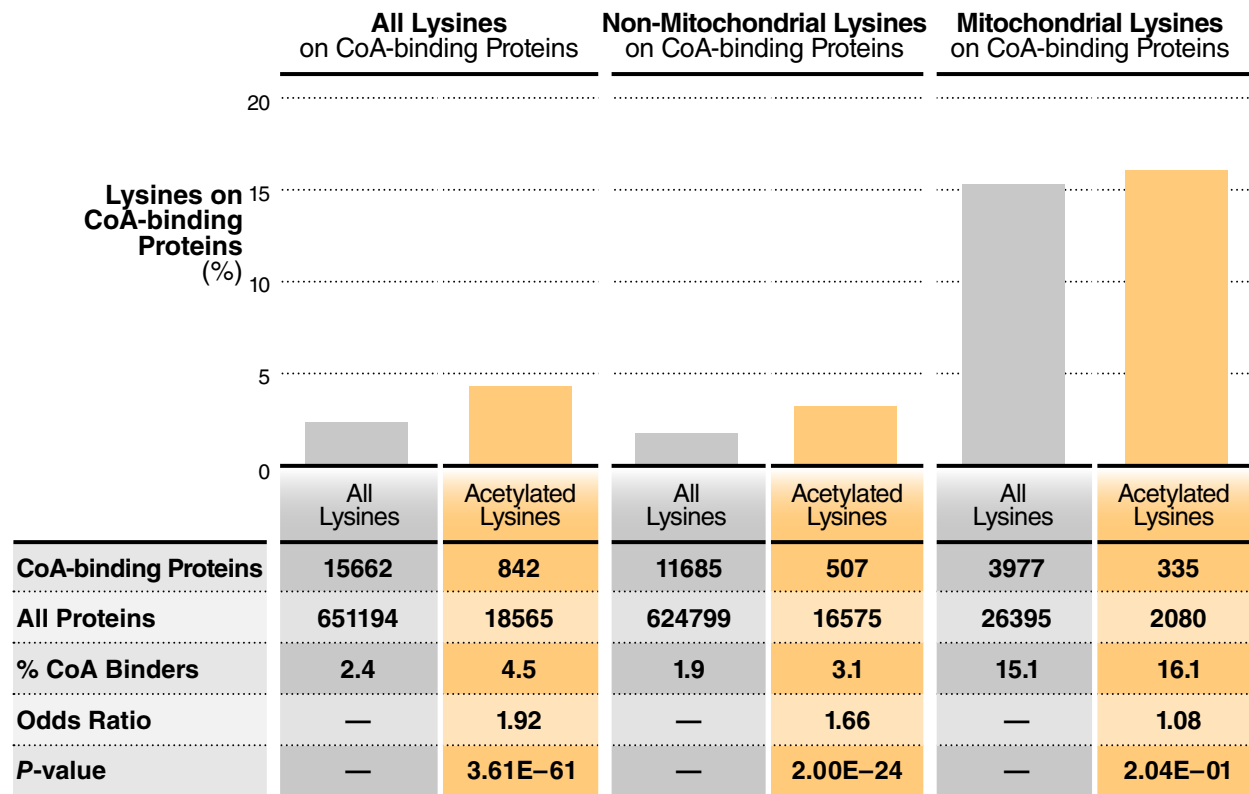

**Supplementary Figure 1: Enrichment of acetylated lysines on CoABPs analyzed in a whole-cell human acetylome dataset.** Table showing the enrichment of acetylated lysines on CoABPs analyzed in a whole-cell acetylome dataset in human HeLa cells. Statistical significances were calculated using Fisher's exact test.

**Source Data**  
**Western Blot raw images**  
**Figure 5B**

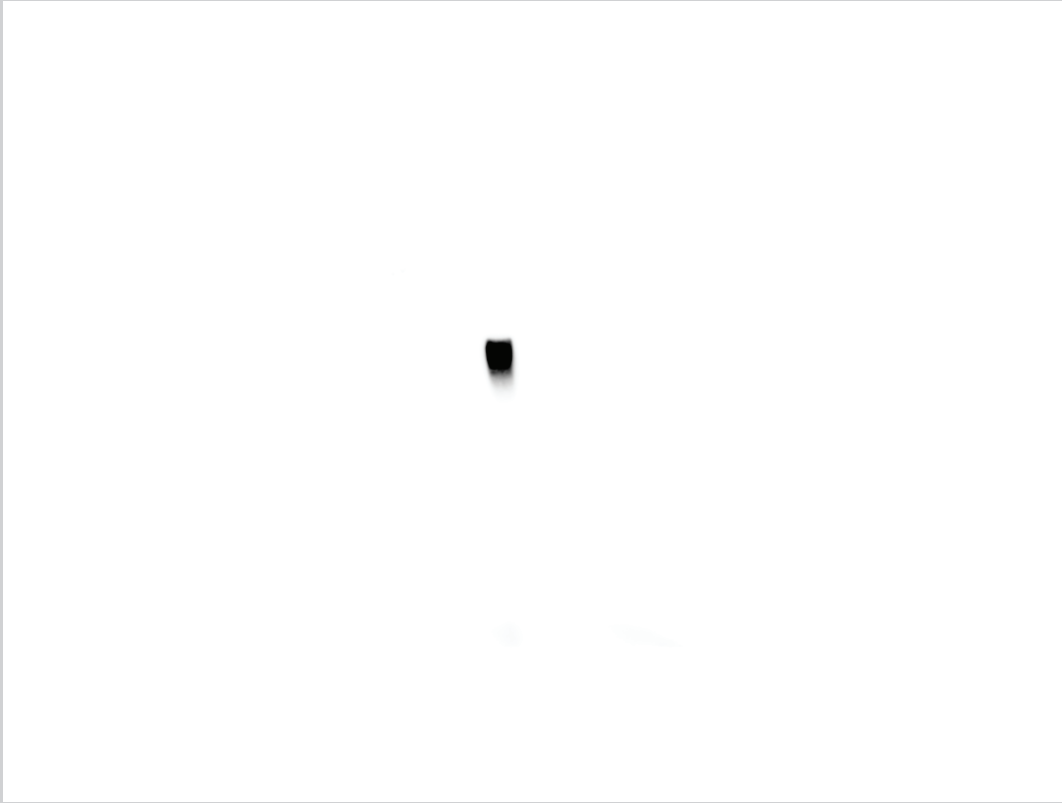

Source Data  
Western Blot raw images  
Figure 5C

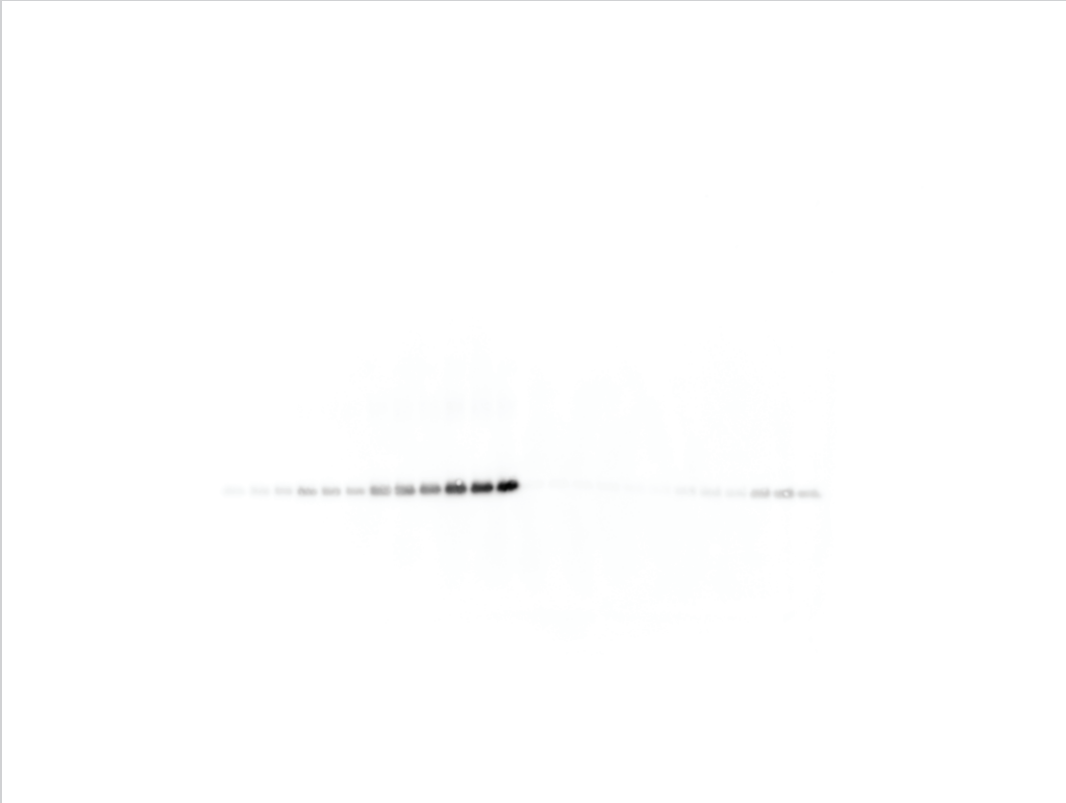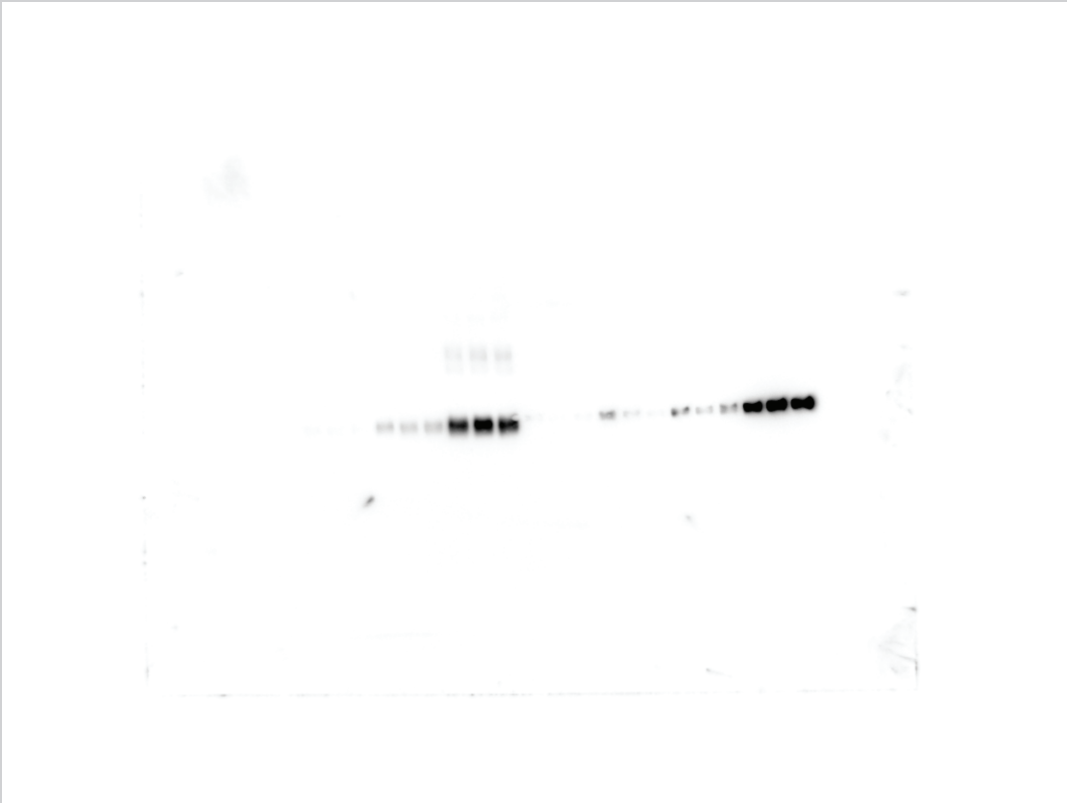

Source Data  
Western Blot raw images with highlighted contrast  
Figure 5C

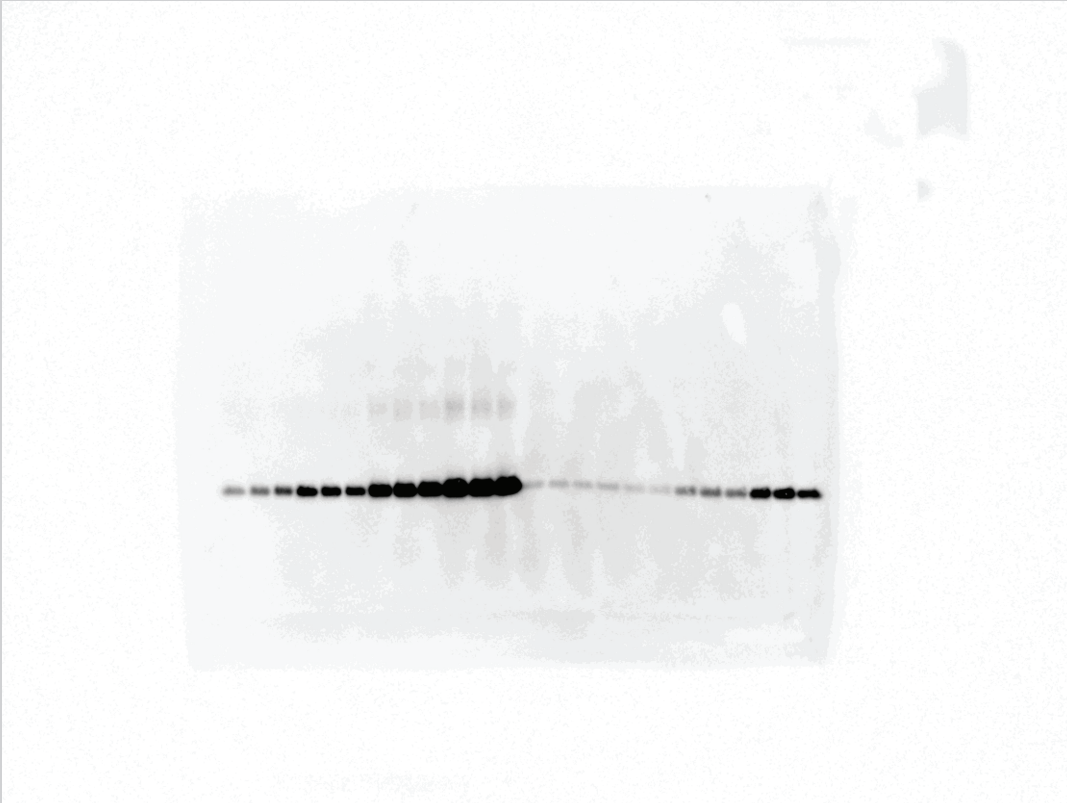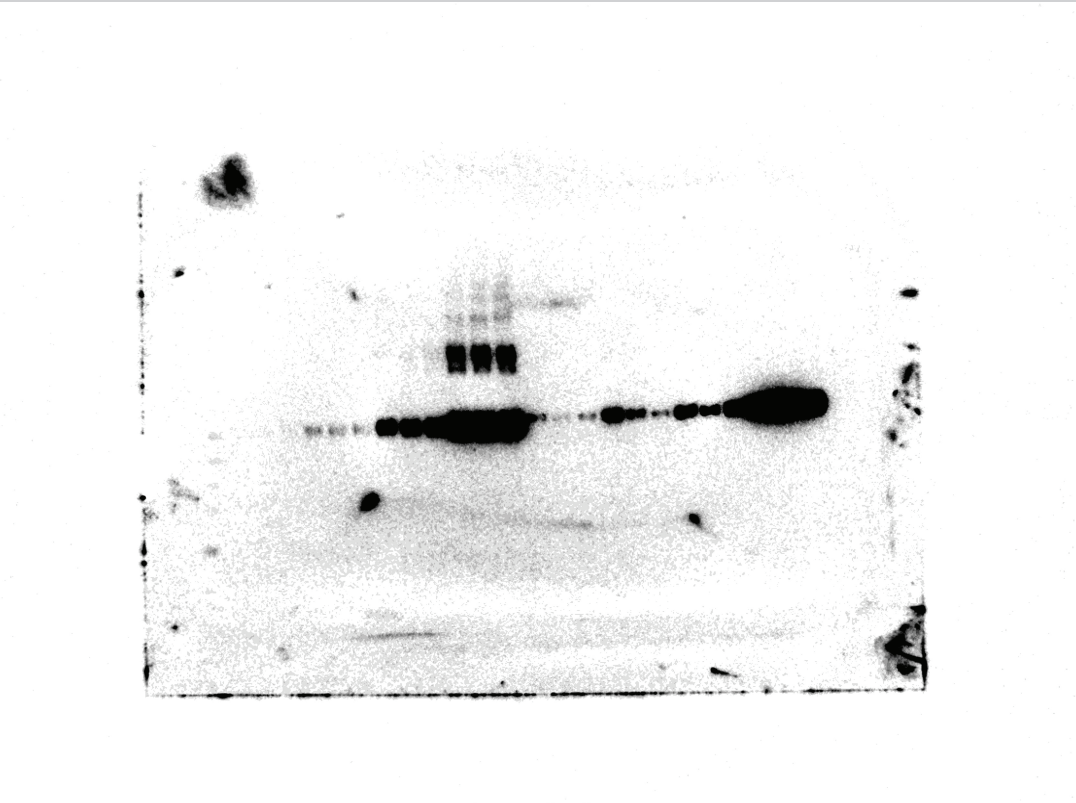

Supplement: 41598_2023_31900_MOESM1_ESM.pdf [file 41598_2023_31900_MOESM1_ESM.pdf]
